# Supplementary material
Source: Research Square preprint supplement (doi:10.21203/rs.3.rs-9331129/v1)
Supplement: Supplementary file 1 [file b8919a32b6c107caa68f8be0.pdf]

# Supplementary Materials

## Supplementary Tables

| Factor                      | BET F-value | BET p-value    | YFT F-value | YFT p-value    |
|-----------------------------|-------------|----------------|-------------|----------------|
| Tag mixing                  | 61.10       | < <b>0.001</b> | 31.77       | < <b>0.001</b> |
| Size-data weighting divisor | 4.59        | <b>0.015</b>   | 17.09       | < <b>0.001</b> |
| Age data weighting          | 0.10        | 0.909          | 0.42        | 0.661          |
| Steepness                   | 2.93        | 0.062          | 0.19        | 0.825          |

Table S1: ANOVA results for key structural assumptions for bigeye (BET) and yellowfin (YFT) tuna in the retrospective analysis. Bold values indicate statistical significance at  $p < 0.05$ .

| Factor                      | BET F-value | BET p-value    | YFT F-value | YFT p-value    |
|-----------------------------|-------------|----------------|-------------|----------------|
| Tag mixing                  | 0.52        | 0.470          | 0.74        | 0.390          |
| Size-data weighting divisor | 3.47        | <b>0.032</b>   | 1.43        | 0.242          |
| Age data weighting          | 0.03        | 0.972          | 0.05        | 0.954          |
| Steepness                   | 0.35        | 0.703          | 1.92        | 0.149          |
| Region                      | 393.89      | < <b>0.001</b> | 629.58      | < <b>0.001</b> |

Table S2: ANOVA results for key structural assumptions for bigeye (BET) and yellowfin (YFT) tuna in the hindcast analysis. Bold values indicate statistical significance at  $p < 0.05$ .
